# Supplementary material for: Study on the Catalytic Oxidation of Toluene Using CeO2@S-AZMB Prepared from Spent Zn-Mn Batteries
Source: MDPI journal article supplement (doi:10.3390/molecules29030616), 2024-01-27
Supplement: s1 [file s1]

## Supplementary data

Study on catalytic oxidation of toluene by  $\text{CeO}_2@\text{S-AZMB}$  prepared

from spent Zn-Mn battery

Zou Yu 1, Du Huan 1, Zhao Zhong<sup>2,\*</sup>, and Wang Zhuozhi<sup>2,\*</sup>

1 Sichuan Water Conservancy College, Chengdu 610000, China;

2 Tianjin Key Laboratory of Clean Energy and Pollutant Control, School of Energy and Environmental Engineering, Hebei University of Technology, Tianjin 300401, China;

\*Correspondence: Z.Z, qidaiwenjing@163.com; W.Z-Z, 2021115@hebut.edu.cn

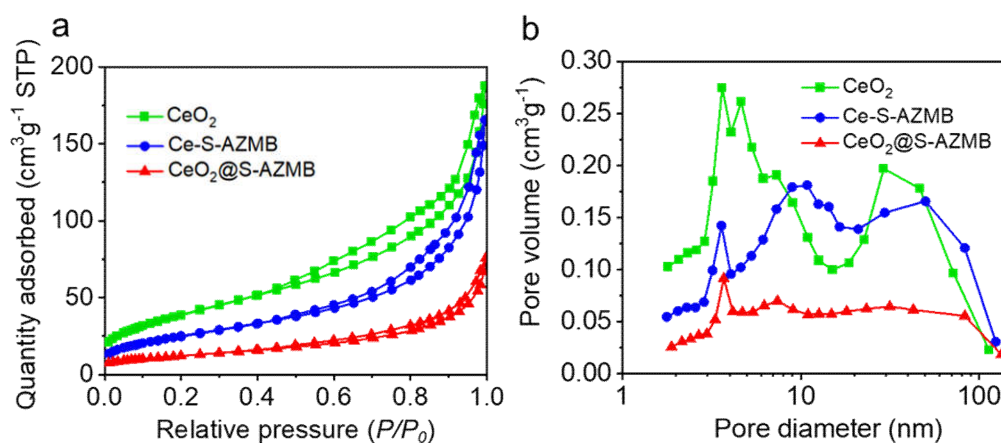

Figure S1. (a)  $\text{N}_2$  adsorption/desorption isotherms and (b) Barrett-Joyner-Halenda (BJH) pore size distribution of  $\text{CeO}_2@\text{S-AZMB}$ ,  $\text{Ce-S-AZMB}$  and  $\text{CeO}_2$
